# Supplementary material
Source: ML conference proceedings conference paper supplement (https://proceedings.neurips.cc/paper_files/paper/2015/hash/32bb90e8976aab5298d5da10fe66f21d-Abstract.html)
Supplement: Supplementary file [file 32bb90e8976aab5298d5da10fe66f21d-Supplemental.zip]

## A Proof of Lemma 1

Let  $A = (a_{ij})$  be a random matrix that is GOE distributed; thus  $a_{ij} \sim \mathcal{N}(0, 1)$  for  $i \neq j$  and  $a_{ii} \sim \mathcal{N}(0, 2)$ . We have  $\mathbb{E}(M) = \sum_{s=1}^r \mathbb{E}((z_s^*{}^\top A z_s^*)A)$ . Hence, it suffices to show that  $\mathbb{E}((x^\top A x)A) = 2xx^\top$  for any  $x \in \mathbb{R}^n$ . The  $(i, j)$  entry of  $(x^\top A x)A$  has expected value

$$\begin{aligned} \mathbb{E}((x^\top A x)a_{ij}) &= \mathbb{E}\left(\sum_k \sum_l x_k x_l a_{kl} a_{ij}\right) \\ &= \sum_k \sum_l x_k x_l \mathbb{E}(a_{kl} a_{ij}) \\ &= \sum_k \sum_l x_k x_l \cdot \begin{cases} 0 & \text{if } (k, l) \neq (i, j) \wedge (k, l) \neq (j, i) \\ \mathbb{E}(a_{kl}^2) & \text{otherwise} \end{cases} \\ &= \begin{cases} 2x_i x_j \mathbb{E}(a_{ij}^2) & \text{if } i \neq j \\ x_i^2 \mathbb{E}(a_{ii}^2) & \text{otherwise} \end{cases} \\ &= \begin{cases} 2x_i x_j & \text{if } i \neq j, \\ 2x_i^2 & \text{otherwise,} \end{cases} \end{aligned}$$

where we use that the variance of  $a_{ii}$  is 2 and the variance of  $a_{ij}$  is 1 for any  $i \neq j$ . In matrix form, this is  $\mathbb{E}((x^\top A x)A) = 2xx^\top$ .

## B Ingredients

We first present some technical lemmas that will be needed later. Recall Definition 2 that for any  $Z$ ,  $\bar{Z} = \arg \min_{\tilde{Z} \in \mathcal{S}} \|Z - \tilde{Z}\|_F$ . Let  $H = Z - \bar{Z}$ . The  $s$ th column of  $Z, \bar{Z}, Z^*, H$  are denoted by  $z_s, \bar{z}_s, z_s^*, h_s$  respectively. We shall use the following formulas for the gradient and second order partial derivatives:

$$\begin{aligned} \nabla f(Z) &= \frac{1}{m} \sum_{i=1}^m (\text{tr}(H^\top A_i H) + 2 \text{tr}(\bar{Z}^\top A_i H)) (A_i H + A_i \bar{Z}), \\ \frac{\partial^2 f(Z)}{\partial z_s \partial z_s^\top} &= \frac{1}{m} \sum_{i=1}^m (2A_i z_s z_s^\top A_i^\top + (\text{tr}(Z^\top A_i Z) - b_i) A_i), \quad \forall s \in [r], \\ \frac{\partial^2 f(Z)}{\partial z_s \partial z_k^\top} &= \frac{1}{m} \sum_{i=1}^m 2A_i z_s z_k^\top A_i^\top, \quad \forall s, k \in [r] \text{ such that } s \neq k. \end{aligned}$$

The next ingredient we need is the expectation of the second order partial derivatives with respect to the random measurement matrices.

**Lemma 2.** *Let  $A = (a_{ij})$  be a GOE distributed random matrix. For any two fixed vectors  $x$  and  $y$ , we have  $\mathbb{E}[AxyA] = x^\top y I + yx^\top$ .*

*Proof.* The expectation of  $(i, j)$  entry of  $Axy^\top A$  is

$$\mathbb{E}[(Axy^\top A)_{ij}] = \mathbb{E}\left(\sum_k \sum_l a_{ik} a_{jk} x_k y_l\right).$$

If  $i = j$ , then we have

$$\mathbb{E}[(Axy^\top A)_{ii}] = \mathbb{E}\left(\sum_k a_{ik}^2 x_k y_k\right) = \sum_k x_k y_k + x_i y_i,$$

since  $\text{Var}(a_{ii}^2) = 2$  and  $\text{Var}(a_{ik}^2) = 1$  if  $k \neq i$ . On the other hand, if  $i \neq j$ , then

$$\mathbb{E}[(Axy^\top A)_{ij}] = \mathbb{E}\left(\sum_{kl} a_{ik} a_{jl} x_k y_l\right) = \mathbb{E}(a_{ij}^2 x_j y_i) = x_j y_i.$$

Therefore,  $\mathbb{E}(Axy^\top A) = x^\top yI + yx^\top$ .  $\square$

**Lemma 3.** For all  $s \in [r]$ , it holds that  $\mathbb{E} \left[ \frac{\partial^2 f(Z)}{\partial z_s \partial z_s^\top} \right] = 2 \|z_s\|^2 I + 2z_s z_s^\top + 2ZZ^\top - 2X^*$  and  $\mathbb{E} \left[ \frac{\partial^2 f(Z)}{\partial z_s \partial z_k^\top} \right] = 2z_s^\top z_k I + 2z_k z_s^\top$  for all  $k \in [r]$  such that  $k \neq s$ , where the expectation is over the random measurement matrices.

*Proof.* The case where  $k \neq s$  is a direct result of Lemma 2. For the other case, let  $A = (a_{ij})$  be a GOE distributed random matrix. It follows from Lemma 1 that

$$\mathbb{E} \left[ \frac{\partial^2 f(Z)}{\partial z_s \partial z_s^\top} \right] = 2\mathbb{E}(Az_s z_s^\top A) + 2ZZ^\top - 2X^*.$$

By Lemma 2, we have

$$\mathbb{E}(Az_s z_s^\top A) = \|z_s\|^2 I + z_s z_s^\top.$$

Substituting this back into the above equation, we obtain the lemma.  $\square$

We next recall a concentration result for the operator (spectral) norm of the random measurement matrices.

**Lemma 4.** (Ledoux and Rider [14, Theorem 1]) There exists two absolute constants  $C$  and  $\rho = \frac{1}{\sqrt{8}C}$  such that with probability at least  $1 - Ce^{-\rho n}$ ,

$$\|A_i\| \leq 3\sqrt{n}.$$

A tighter upper bound is actually given in the Tracy-Widow law: w.h.p.  $\|A_i\| = O(2\sqrt{n} + n^{1/6})$ .

**Corollary 1.** With probability at least  $1 - mCe^{-\rho n}$ , the average of the squared operator norm of the random measurement matrices is upper bounded by  $9n$ .

*Proof.* Applying a union bound we have

$$\begin{aligned} \mathbb{P} \left( \frac{1}{m} \sum_{i=1}^m \|A_i\|^2 \leq 9n \right) &\geq \mathbb{P}(\forall i, \|A_i\| \leq 3\sqrt{n}) \\ &\geq 1 - \sum_{i=1}^m \mathbb{P}(\|A_i\| > 3\sqrt{n}) \\ &\geq 1 - mCe^{-\rho n}, \end{aligned}$$

where we use Lemma 4 in the last line.  $\square$

The following two technical lemmas are important tools for us. Define the set

$$E(\varepsilon) = \{Z \mid d(Z, Z^*) \leq \varepsilon\}.$$

**Lemma 5.** Suppose that **A1** holds:  $\left\| \frac{1}{m} \sum_{i=1}^m (u^\top A_i u) A_i - 2uu^\top \right\| \leq \frac{\delta}{r}$ , for any  $u$  such that  $\|u\| \leq \sqrt{\sigma_1}$ . If  $\delta \leq \frac{1}{16}\sigma_r$ , then for any  $Z \in E\left(\sqrt{\frac{3}{16}\sigma_r}\right)$  it holds that

$$2\|HH^\top\|_F^2 - \delta\|H\|_F^2 \leq \frac{1}{m} \sum_{i=1}^m \text{tr}(H^\top A_i H)^2 \leq \delta\|H\|_F^2 + 2\|HH^\top\|_F^2.$$

*Proof.* Let  $h_s$  be the  $s$ th column of  $H$ . Since  $\max_{s \in [r]} \|h_s\|_2 \leq \|H\|_F \leq \sqrt{\frac{3}{16}\sigma_r} \leq \sqrt{\sigma_1}$ , it follows from the assumption of the lemma that

$$\left\| \frac{1}{m} \sum_{i=1}^m (h_s^\top A_i h_s) A_i - 2h_s h_s^\top \right\| \leq \frac{\delta}{r}, \quad s = 1, \dots, r.$$

By the triangle inequality, we have

$$\left\| \frac{1}{m} \sum_{i=1}^m \sum_{s=1}^r (h_s^\top A_i h_s) A_i - 2 \sum_{s=1}^r h_s h_s^\top \right\| \leq \delta$$

and consequently

$$-\delta \|h_s\|^2 \leq h_s^\top \left( \frac{1}{m} \sum_{i=1}^m \text{tr}(H^\top A_i H) A_i - 2 H H^\top \right) h_s \leq \delta \|h_s\|^2, \quad s = 1, \dots, r,$$

where we replace  $\sum_{s=1}^r h_s^\top A_i h_s$  by  $\text{tr}(H^\top A_i H)$  and  $\sum_{s=1}^r h_s h_s^\top$  by  $H H^\top$ . Taking the sum of the above inequalities, we obtain

$$-\delta \|H\|_F^2 \leq \frac{1}{m} \sum_{i=1}^m \text{tr}(H^\top A_i H)^2 - 2 \text{tr}(H^\top H H^\top H) \leq \delta \|H\|_F^2.$$

Note that  $\text{tr}(H^\top H H^\top H) = \|H H^\top\|_F^2$ . Therefore,

$$2 \|H H^\top\|_F^2 - \delta \|H\|_F^2 \leq \frac{1}{m} \sum_{i=1}^m \text{tr}(H^\top A_i H)^2 \leq \delta \|H\|_F^2 + 2 \|H H^\top\|_F^2.$$

□

**Lemma 6.** Suppose that **A2** holds: for any  $\tilde{Z}$  such that  $\tilde{Z} \tilde{Z}^\top = X^*$  we have

$$\left\| \frac{\partial^2 f(\tilde{Z})}{\partial \tilde{z}_s \partial \tilde{z}_k^\top} - \mathbb{E} \left[ \frac{\partial^2 f(\tilde{Z})}{\partial \tilde{z}_s \partial \tilde{z}_k^\top} \right] \right\| \leq \frac{\delta}{r}, \quad s, k = 1, \dots, r. \quad (7)$$

Then

$$\left( \sigma_r - \frac{\delta}{2} \right) \|H\|_F^2 + \|H^\top \bar{Z}\|_F^2 \leq \frac{1}{m} \sum_{i=1}^m \text{tr}(H^\top A_i \bar{Z})^2 \leq \left( \sigma_1 + \frac{\delta}{2} \right) \|H\|_F^2 + \|H^\top \bar{Z}\|_F^2.$$

*Proof.* Our goal is to bound  $\frac{1}{m} \sum_{i=1}^m \text{tr}(H^\top A_i \bar{Z})^2$ . This can be expanded as

$$\frac{1}{m} \sum_{i=1}^m \left( \sum_{s=1}^r (h_s^\top A_i \bar{z}_s) \right)^2 = \frac{1}{m} \sum_{i=1}^m \sum_{s=1}^r (h_s^\top A_i x_s)^2 + \frac{1}{m} \sum_{i=1}^m \sum_{s < k} 2 (h_s^\top A_i x_s) (h_k^\top A_i x_k).$$

We first bound the sum of the quadratic terms. For any  $s \in [r]$ , we have

$$\begin{aligned} \frac{\partial^2 f(\bar{Z})}{\partial \bar{z}_s \partial \bar{z}_s^\top} &= \frac{1}{m} \sum_{i=1}^m 2 A_i \bar{z}_s \bar{z}_s^\top A_i, \\ \mathbb{E} \left[ \frac{\partial^2 f(\bar{Z})}{\partial \bar{z}_s \partial \bar{z}_s^\top} \right] &= 2 \|\bar{z}_s\|^2 I + 2 \bar{z}_s \bar{z}_s^\top. \end{aligned}$$

It follows from assumption (7) that for any  $s \in [r]$ ,

$$-\frac{\delta}{r} \|h_s\|^2 \leq \frac{1}{m} \sum_{i=1}^m 2 (h_s^\top A_i \bar{z}_s)^2 - 2 \|\bar{z}_s\|^2 \|h_s\|^2 - 2 (h_s^\top \bar{z}_s)^2 \leq \frac{\delta}{r} \|h_s\|^2.$$

Taking the sum of above inequalities, we obtain

$$-\frac{\delta}{2r} \sum_{s=1}^r \|h_s\|^2 \leq \frac{1}{m} \sum_{i=1}^m \sum_{s=1}^r (h_s^\top A_i \bar{z}_s)^2 - \sum_{s=1}^r \|\bar{z}_s\|^2 \|h_s\|^2 - \sum_{s=1}^r (h_s^\top \bar{z}_s)^2 \leq \frac{\delta}{2r} \sum_{s=1}^r \|h_s\|^2. \quad (8)$$

Similarly, we bound the sum of the cross terms. For any fixed  $s, k$  such that  $s \neq k$ , we have

$$\begin{aligned}\frac{\partial^2 f(\bar{Z})}{\partial \bar{z}_s \partial \bar{z}_k^\top} &= \frac{1}{m} f(\bar{Z}) \sum_{i=1}^m 2A_i \bar{z}_s \bar{z}_k^\top A_i, \\ \mathbb{E} \left[ \frac{\partial^2 f(\bar{Z})}{\partial \bar{z}_s \partial \bar{z}_k^\top} \right] &= 2\bar{z}_s^\top \bar{z}_k I + 2\bar{z}_k \bar{z}_s^\top,\end{aligned}$$

and consequently

$$\begin{aligned}-\frac{\delta}{r} \sum_{s < k} \|h_s\| \|h_k\| &\leq \frac{1}{m} \sum_{i=1}^m \sum_{s < k} 2(h_s^\top A_i \bar{z}_s)(h_k^\top A_i \bar{z}_k) - 2 \sum_{s < k} \bar{z}_s^\top \bar{z}_k h_s^\top h_k - 2 \sum_{s < k} h_s^\top \bar{z}_k \bar{z}_s^\top h_k \\ &\leq \frac{\delta}{r} \sum_{s < k} \|h_s\| \|h_k\|.\end{aligned}\tag{9}$$

We combine equations (9) and (8) to get

$$-\frac{\delta}{2r} \sum_{s < k} \|h_s\| \|h_k\| \leq \frac{1}{m} \sum_{i=1}^m \text{tr}(H^\top A_i \bar{Z})^2 - \sum_{s < k} \bar{z}_s^\top \bar{z}_k h_s^\top h_k - \sum_{s < k} h_s^\top \bar{z}_k \bar{z}_s^\top h_k \leq \frac{\delta}{2r} \sum_{s < k} \|h_s\| \|h_k\|.\tag{10}$$

Note that  $\sum_{s < k} h_s^\top \bar{z}_k \bar{z}_s^\top h_k = \text{tr}(H^\top \bar{Z} H^\top \bar{Z})$ ,  $\sum_{s < k} \bar{z}_s^\top \bar{z}_k h_s^\top h_k = \|\bar{Z} H^\top\|_F^2$  and

$$\sum_{s < k} \|h_s\| \|h_k\| = \left( \sum_{s=1}^r \|h_s\| \right)^2 \leq r \sum_{s=1}^r \|h_s\|^2 = r \|H\|_F^2.$$

By Lemma 7,  $\text{tr}(H^\top \bar{Z} H^\top \bar{Z}) = \|H^\top \bar{Z}\|_F^2$ . Replacing those terms in equation (10) gives us

$$-\frac{\delta}{2} \|H\|_F^2 + \|\bar{Z} H^\top\|_F^2 + \|H^\top \bar{Z}\|_F^2 \leq \frac{1}{m} \sum_{i=1}^m \text{tr}(H^\top A_i \bar{Z})^2 \leq \frac{\delta}{2} \|H\|_F^2 + \|\bar{Z} H^\top\|_F^2 + \|H^\top \bar{Z}\|_F^2.$$

Finally, we obtain the claim by noticing that

$$\sqrt{\sigma_r} \|H\|_F \leq \|\bar{Z} H^\top\|_F \leq \sqrt{\sigma_1} \|H\|_F,$$

where  $\sqrt{\sigma_1} = \sigma_{\max}(\bar{Z}) \geq \dots \geq \sigma_{\min}(\bar{Z}) = \sqrt{\sigma_r}$  are the singular values of  $\bar{Z}$ .  $\square$

**Lemma 7.**  $\text{tr}(H^\top \bar{Z} H^\top \bar{Z}) = \|H^\top \bar{Z}\|_F^2$ .

*Proof.* Let  $\bar{U} = \arg \min_{U U^\top = U^\top U = I} \|Z - Z^* U\|_F^2 = \arg \max_{U U^\top = U^\top U = I} \langle U, Z^{*\top} Z \rangle$ . Note that  $\langle A, B \rangle \leq \|A\|_* \|B\|$  for any matrices  $A, B$  that are of the same size. The equality holds when  $B = U_A V_A^\top$  where  $A = U_A \Sigma_A V_A^\top$  is the SVD of  $A$ . Hence,  $\bar{U} = \tilde{U} \tilde{V}^\top$  where  $\tilde{U} \tilde{S} \tilde{V}^\top$  is the SVD of  $Z^{*\top} Z$ ;  $\bar{Z} = Z^* \bar{U}$ . Therefore,  $Z^\top \bar{Z} = Z^\top Z^* \bar{U} = \tilde{V} \tilde{S} \tilde{V}^\top$  is symmetric and positive semidefinite. Thus,  $H^\top \bar{Z} = Z^\top \bar{Z} - \bar{Z}^\top \bar{Z}$  is also symmetric. This implies that  $\text{tr}(H^\top \bar{Z} H^\top \bar{Z}) = \|H^\top \bar{Z}\|_F^2$ .  $\square$

## C Linear Convergence

### Proof of Theorem 3

Let  $H^k = Z^k - \bar{Z}^k$ . Then we have that

$$\begin{aligned}
\|Z^{k+1} - \bar{Z}^k\|_F^2 &= \left\| Z^k - \frac{\mu}{\|Z^*\|_F^2} \nabla f(Z^k) - \bar{Z}^k \right\|_F^2 \\
&= \|H^k\|_F^2 + \frac{\mu^2}{\|Z^*\|_F^4} \|\nabla f(Z^k)\|_F^2 - \frac{2\mu}{\|Z^*\|_F^2} \langle \nabla f(Z^k), H^k \rangle \\
&\leq \|H^k\|_F^2 + \frac{\mu^2}{\|Z^*\|_F^4} \|\nabla f(Z^k)\|_F^2 - \frac{2\mu}{\|Z^*\|_F^2} \left( \frac{1}{\alpha} \sigma_r \|H^k\|_F^2 + \frac{1}{\beta \|Z^*\|_F^2} \|\nabla f(Z^k)\|_F^2 \right) \\
&= \left( 1 - \frac{2\mu}{\alpha} \cdot \frac{\sigma_r}{\sum_{s=1}^r \sigma_s} \right) \|H^k\|_F^2 + \frac{\mu(\mu - 2/\beta)}{\|Z^*\|_F^4} \|\nabla f(Z^k)\|_F^2 \\
&\leq \left( 1 - \frac{2\mu}{\alpha} \cdot \frac{\sigma_r}{r\sigma_1} \right) \|H^k\|_F^2 \\
&= \left( 1 - \frac{2\mu}{\alpha\kappa r} \right) d(Z^k, Z^*)^2,
\end{aligned}$$

where we use the definition of  $RC(\varepsilon, \alpha, \beta)$  in the third line,  $\|Z^*\|_F^2 = \|X^*\|_* = \sum_{s=1}^r \sigma_s$  in the third to last line and  $0 < \mu < \min\{\alpha/2, 2/\beta\}$  in the second to last line. Therefore,

$$d(Z^{k+1}, Z^*) = \min_{\tilde{Z} \in \mathcal{S}} \|Z^{k+1} - \tilde{Z}\|_F^2 \leq \sqrt{1 - \frac{2\mu}{\alpha\kappa r}} d(Z^k, Z^*).$$

## D Regularity Condition

As mentioned before, Nesterov [16, Theorem 2.1.11] shows that the gradient scheme converges linearly under a condition similar to the regularity condition, which is satisfied if the function is strongly convex and has a Lipschitz continuous gradient (*strongly smooth*). In order to prove Theorem 4, we show that with high probability the function  $f$  satisfies the local curvature condition, which is analogous to strong convexity, and the local smoothness condition, which is analogous to strong smoothness.

### C1 Local Curvature Condition

There exists a constant  $C_1$  such that for any  $Z$  satisfying  $d(Z, Z^*) \leq \sqrt{\frac{3}{16}\sigma_r}$ ,

$$\langle \nabla f(Z), Z - \bar{Z} \rangle \geq C_1 \|Z - \bar{Z}\|_F^2 + \|(Z - \bar{Z})^\top \bar{Z}\|_F^2.$$

### C2 Local Smoothness Condition

There exist constants  $C_2, C_3$  such that for any  $Z$  satisfying  $d(Z, Z^*) \leq \sqrt{\frac{3}{16}\sigma_r}$ ,

$$\|\nabla f(Z)\|_F^2 \leq C_2 \|Z - \bar{Z}\|_F^2 + C_3 \|(Z - \bar{Z})^\top \bar{Z}\|_F^2.$$

### D.1 Proof of the Local Curvature Condition

$$\begin{aligned}
\langle \nabla f(Z), H \rangle &= \overbrace{\frac{2}{m} \sum_{i=1}^m \text{tr}(H^\top A_i \bar{Z})^2}^{p^2} + \overbrace{\frac{1}{m} \sum_{i=1}^m \text{tr}(H^\top A_i H)^2}^{q^2} + \frac{3}{m} \sum_{i=1}^m \text{tr}(H^\top A_i \bar{Z}) \text{tr}(H^\top A_i H) \\
&\geq p^2 + q^2 - \frac{3}{m} \sqrt{\sum_{i=1}^m \text{tr}(H^\top A_i \bar{Z})^2} \sqrt{\sum_{i=1}^m \text{tr}(H^\top A_i H)^2} \\
&= p^2 + q^2 - \frac{3}{\sqrt{2}} \sqrt{\overbrace{\frac{2}{m} \sum_{i=1}^m \text{tr}(H^\top A_i \bar{Z})^2}^p} \sqrt{\overbrace{\frac{1}{m} \sum_{i=1}^m \text{tr}(H^\top A_i H)^2}^q} \\
&= \left( p - \frac{3}{2\sqrt{2}} q \right)^2 - \frac{1}{8} q^2 \\
&\geq \left( \frac{p^2}{2} - \frac{9}{8} q^2 \right) - \frac{1}{8} q^2 \\
&= \frac{p^2}{2} - \frac{5}{4} q^2 = \frac{1}{m} \sum_{i=1}^m \text{tr}(H^\top A_i \bar{Z})^2 - \frac{5}{4} \frac{1}{m} \sum_i \text{tr}(H^\top A_i H)^2 \\
&\geq \left( \sigma_r - \frac{\delta}{2} \right) \|H\|_F^2 + \|H^\top \bar{Z}\|_F^2 - \frac{5\delta}{4} \|H\|_F^2 - \frac{5}{2} \|HH^\top\|_F^2 \\
&\geq \left( \sigma_r - \frac{5}{2} \|H\|_F^2 - \frac{7}{4} \delta \right) \|H\|_F^2 + \|H^\top \bar{Z}\|_F^2.
\end{aligned}$$

where we use Cauchy-Schwarz inequality in the 2nd line, the inequality  $(a - b)^2 \geq \frac{a^2}{2} - b^2$  in the 5th line, Lemma 5 and 6 in the 7th line, and the fact that  $\|HH^\top\|_F \leq \|H\|_F^2$  in the 8th line. Since  $\|H\|_F \leq \sqrt{\frac{3}{16} \sigma_r}$  and  $\delta \leq \frac{1}{16} \sigma_r$ , we have

$$\langle \nabla f(Z), H \rangle \geq \frac{27}{64} \sigma_r \|H\|_F^2 + \|H^\top \bar{Z}\|_F^2. \quad (11)$$

### D.2 Proof of the Local Smoothness Condition

We need to upper bound  $\|\nabla f(Z)\|_F^2 = \max_{\|W\|_F=1} |\langle \nabla f(Z), W \rangle|^2$ . It suffices to show that for any  $W \in \mathbb{R}^{n \times R}$  of unit Frobenius norm,  $|\langle \nabla f(Z), W \rangle|^2$  is upper bounded if  $Z \in E\left(\sqrt{\frac{3}{16} \sigma_r}\right)$ .

Since  $(a + b + c + d)^2 \leq 4(a^2 + b^2 + c^2 + d^2)$ , we have

$$\begin{aligned}
|\langle \nabla f(Z), W \rangle|^2 &= \left( \frac{1}{m} \sum_{i=1}^m (\text{tr}(H^\top A_i H) + 2 \text{tr}(H^\top A_i \bar{Z})) (\text{tr}(W^\top A_i H) + \text{tr}(W^\top A_i \bar{Z})) \right)^2 \\
&= \left( \frac{1}{m} \sum_{i=1}^m \text{tr}(H^\top A_i H) \text{tr}(W^\top A_i H) + 2 \text{tr}(H^\top A_i \bar{Z}) \text{tr}(W^\top A_i H) \right. \\
&\quad \left. + \text{tr}(H^\top A_i H) \text{tr}(W^\top A_i \bar{Z}) + 2 \text{tr}(H^\top A_i \bar{Z}) \text{tr}(W^\top A_i \bar{Z}) \right)^2 \\
&\leq 4 \left( \frac{1}{m} \sum_{i=1}^m \text{tr}(H^\top A_i H) \text{tr}(W^\top A_i H) \right)^2 + 4 \left( \frac{2}{m} \sum_{i=1}^m \text{tr}(H^\top A_i \bar{Z}) \text{tr}(W^\top A_i H) \right)^2 \\
&\quad + 4 \left( \frac{1}{m} \sum_{i=1}^m \text{tr}(H^\top A_i H) \text{tr}(W^\top A_i \bar{Z}) \right)^2 + 4 \left( \frac{2}{m} \sum_{i=1}^m \text{tr}(H^\top A_i \bar{Z}) \text{tr}(W^\top A_i \bar{Z}) \right)^2.
\end{aligned}$$

The first term in the righthand side can be upper bounded as

$$\begin{aligned}
4 \left( \frac{1}{m} \sum_{i=1}^m \text{tr}(H^\top A_i H) \text{tr}(W^\top A_i H) \right)^2 &\leq 4 \left( \frac{1}{m} \sum_{i=1}^m \text{tr}(H^\top A_i H)^2 \right) \left( \frac{1}{m} \sum_{i=1}^m \text{tr}(W^\top A_i H)^2 \right) \\
&\leq 4 \left( 2 \|H\|_F^4 + \delta \|H\|_F^2 \right) \left( \frac{1}{m} \sum_{i=1}^m \|W\|_F^2 \|A_i H\|_F^2 \right) \\
&= 4 \left( 2 \|H\|_F^4 + \delta \|H\|_F^2 \right) \left( \frac{1}{m} \sum_{i=1}^m \|A_i H\|_F^2 \right) \\
&\leq 4 \left( 2 \|H\|_F^4 + \delta \|H\|_F^2 \right) \left( \frac{1}{m} \sum_{i=1}^m \|A_i\|^2 \|H\|_F^2 \right) \\
&\leq 36n \|H\|_F^2 \left( 2 \|H\|_F^4 + \delta \|H\|_F^2 \right),
\end{aligned}$$

where we use the Cauchy-Schwarz inequality in the first and second line, Lemma 5 and  $\|HH^\top\|_F \leq \|H\|_F^2$  in the third line and Corollary 1 in the last line.

The other three terms are bounded similarly. For the second term, we have

$$\begin{aligned}
4 \left( \frac{2}{m} \sum_{i=1}^m \text{tr}(H^\top A_i \bar{Z}) \text{tr}(W^\top A_i H) \right)^2 &\leq 16 \left( \frac{1}{m} \sum_{i=1}^m \text{tr}(H^\top A_i \bar{Z})^2 \right) \left( \frac{1}{m} \sum_{i=1}^m \text{tr}(W^\top A_i H)^2 \right) \\
&\leq 36n \|H\|_F^2 \left( (4\sigma_1 + 2\delta) \|H\|_F^2 + 4 \|H^\top \bar{Z}\|_F^2 \right),
\end{aligned}$$

where we use Lemma 6 and 1. The third term is bounded as

$$\begin{aligned}
4 \left( \frac{1}{m} \sum_{i=1}^m \text{tr}(H^\top A_i H) \text{tr}(W^\top A_i \bar{Z}) \right)^2 &\leq 4 \left( \frac{1}{m} \sum_{i=1}^m \text{tr}(H^\top A_i H)^2 \right) \left( \frac{1}{m} \sum_{i=1}^m \text{tr}(W^\top A_i \bar{Z})^2 \right) \\
&\leq 36n \|\bar{Z}\|_F^2 \left( 2 \|H\|_F^4 + \delta \|H\|_F^2 \right),
\end{aligned}$$

and the fourth term is bounded as

$$\begin{aligned}
4 \left( \frac{2}{m} \sum_{i=1}^m \text{tr}(H^\top A_i \bar{Z}) \text{tr}(W^\top A_i \bar{Z}) \right)^2 &\leq 16 \left( \frac{1}{m} \sum_{i=1}^m \text{tr}(H^\top A_i \bar{Z})^2 \right) \left( \frac{1}{m} \sum_{i=1}^m \text{tr}(W^\top A_i \bar{Z})^2 \right) \\
&\leq 36n \|\bar{Z}\|_F^2 \left( (4\sigma_1 + 2\delta) \|H\|_F^2 + 4 \|H^\top \bar{Z}\|_F^2 \right).
\end{aligned}$$

Putting these inequalities together, we have

$$\|\nabla f(Z)\|_F^2 \leq 36n \left( \|\bar{Z}\|_F^2 + \|H\|_F^2 \right) \left( 2 \|H\|_F^4 + (4\sigma_1 + 3\delta) \|H\|_F^2 + 4 \|H^\top \bar{Z}\|_F^2 \right).$$

Hence,

$$\frac{\|\nabla f(Z)\|_F^2}{144n \left( \|\bar{Z}\|_F^2 + \|H\|_F^2 \right)} \leq \left( \sigma_1 + \frac{1}{2} \|H\|_F^2 + \frac{3}{4} \delta \right) \|H\|_F^2 + \|H^\top \bar{Z}\|_F^2.$$

Since  $\|H\|_F \leq \sqrt{\frac{3}{16} \sigma_r}$  and  $\delta \leq \frac{1}{16} \sigma_r$ , we have

$$\frac{\|\nabla f(Z)\|^2}{144n \left( \|\bar{Z}\|_F^2 + (3/16) \sigma_r \right)} \leq \left( \sigma_1 + \frac{9}{64} \sigma_r \right) \|H\|_F^2 + \|H^\top \bar{Z}\|_F^2.$$

### D.3 Proof of the Regularity Condition

Now we combine the curvature and the smoothness conditions. For any  $\gamma \in \left(0, \frac{\sigma_1}{\sigma_r}\right)$ , it holds that

$$\gamma \frac{\sigma_r}{\sigma_1} \cdot \frac{\|\nabla f(Z)\|_F^2}{144n \left( \|\bar{Z}\|_F^2 + (3/16) \sigma_r \right)} \leq \gamma \frac{\sigma_r}{\sigma_1} \cdot \left( \sigma_1 + \frac{9}{64} \sigma_r \right) \|H\|_F^2 + \|H^\top \bar{Z}\|_F^2. \quad (12)$$

Combining equation (11) and (12), we obtain

$$\begin{aligned}\langle \nabla f(Z), H \rangle &\geq \left( \frac{27}{64} - \gamma - \gamma \frac{\sigma_r}{\sigma_1} \frac{9}{64} \right) \sigma_r \|H\|_F^2 + \gamma \frac{\sigma_r}{\sigma_1} \cdot \frac{\|\nabla f(Z)\|_F^2}{144n(\|\bar{Z}\|_F^2 + (3/16)\sigma_r)} \\ &\geq \left( \frac{27}{64} - \frac{73}{64}\gamma \right) \sigma_r \|H\|_F^2 + \gamma \frac{\sigma_r}{\sigma_1} \cdot \frac{\|\nabla f(Z)\|_F^2}{144n(\|\bar{Z}\|_F^2 + (3/16)\sigma_r)}.\end{aligned}$$

If we take  $\gamma = \frac{1}{3}$ , then

$$\begin{aligned}\langle \nabla f(Z), H \rangle &\geq \frac{1}{24} \sigma_r \|H\|_F^2 + \frac{\sigma_r}{\sigma_1} \cdot \frac{\|\nabla f(Z)\|_F^2}{3 \cdot 144n(\|\bar{Z}\|_F^2 + (3/16)\sigma_r)} \\ &\geq \frac{1}{24} \sigma_r \|H\|_F^2 + \frac{\sigma_r/\sigma_1}{513n\|Z^*\|_F^2} \|\nabla f(Z)\|_F^2,\end{aligned}$$

where we use  $\|\bar{Z}\|_F^2 = \|Z^*\|_F^2 = \|X^*\|_* \geq \sigma_r$ . Thus we have

$$\langle \nabla f(Z), H \rangle \geq \frac{1}{\alpha} \sigma_r \|H\|_F^2 + \frac{1}{\beta \|Z^*\|_F^2} \|\nabla f(Z)\|_F^2$$

for  $\alpha \geq 24$  and  $\beta \geq \frac{\sigma_1}{\sigma_r} \cdot 513n$ .

## E Initialization

### Proof of Theorem 5

By assumption, we have

$$\left\| \frac{1}{m} \sum_{i=1}^m (z_s^{*\top} A_i z_s^*) A_i - 2 z_s^* z_s^{*\top} \right\| \leq \frac{\delta}{r}, \quad s \in [r].$$

Hence,

$$\|M - 2X^*\| = \left\| \frac{1}{m} \sum_{i=1}^m \sum_{s=1}^r (z_s^{*\top} A_i z_s^*) A_i - 2 \sum_{s=1}^r z_s^* z_s^{*\top} \right\| \leq \sum_{s=1}^r \left\| \frac{1}{m} \sum_{i=1}^m (z_s^{*\top} A_i z_s^*) A_i - 2 z_s^* z_s^{*\top} \right\| \leq \delta. \quad (13)$$

Let  $\lambda'_1 \geq \dots \geq \lambda'_n$  be the eigenvalues of  $M$ . By Weyl's theorem, we have

$$|\lambda'_s - 2\sigma_s| \leq \delta, \quad s \in [n].$$

Since  $\delta < \sigma_r$ , it is easy to see  $\lambda'_1 \geq \dots \geq \lambda'_r > \delta$  and  $|\lambda'_s| \leq \delta, s = r+1, \dots, n$ . Hence,  $\lambda_s = \lambda'_s, s \in [r]$ , and  $Z^0 Z^{0\top}$  is the best rank  $r$  approximation of  $\frac{1}{2}M$ . Therefore,

$$\begin{aligned}\|Z^0 Z^{0\top} - Z^* Z^{*\top}\|_F &= \left\| Z^0 Z^{0\top} - \frac{1}{2}M + \frac{1}{2}M - Z^* Z^{*\top} \right\|_F \\ &\leq \left\| Z^0 Z^{0\top} - \frac{1}{2}M \right\|_F + \left\| \frac{1}{2}M - Z^* Z^{*\top} \right\|_F \\ &\leq 2 \left\| \frac{1}{2}M - Z^* Z^{*\top} \right\|_F \\ &\leq \sqrt{2r} \|M - 2Z^* Z^{*\top}\| \\ &\leq \sqrt{2r} \delta.\end{aligned}$$

where we used the fact  $Z^0 Z^{0\top} = \arg \min_{\text{rank}(X) \leq r} \|X - Z^* Z^{*\top}\|_F$  in the third line,  $\|A\|_F \leq \sqrt{\text{rank}(A)} \|A\|$  in the second to last line, and inequality (13) in the last line.



Let  $H = Z^0 - \bar{Z}^0$ . We want to bound  $d(Z^0, Z^*)^2 = \|H\|_F^2$ . According to the discussion in Lemma 7,  $H^\top \bar{Z}^0$  is symmetric and  $Z^{0\top} \bar{Z}^0$  is positive semidefinite.

The following step closely follows [21]. It holds that

$$\begin{aligned}
\|Z^0 Z^{0\top} - Z^* Z^{*\top}\|_F^2 &= \|Z^0 Z^{0\top} - \bar{Z}^0 \bar{Z}^{0\top}\|_F^2 \\
&= \|H \bar{Z}^{0\top} + \bar{Z}^0 H^\top + H H^\top\|_F^2 \\
&= \text{tr} \left( \bar{Z}^0 H^\top H \bar{Z}^{0\top} + H \bar{Z}^{0\top} H \bar{Z}^{0\top} + H H^\top \bar{Z}^{0\top} \right. \\
&\quad \left. + \bar{Z}^0 H^\top \bar{Z}^0 H^\top + H \bar{Z}^{0\top} \bar{Z}^0 H + H H^\top \bar{Z}^0 H^\top \right. \\
&\quad \left. + \bar{Z}^0 H^\top H H^\top + H \bar{Z}^{0\top} H H^\top + H H^\top H H^\top \right) \\
&= \text{tr} \left( (H^\top H)^2 + 2(H^\top \bar{Z}^0)^2 + 2(H^\top H)(\bar{Z}^{0\top} \bar{Z}^0) + 4(H^\top H)(H^\top \bar{Z}^0) \right) \\
&= \text{tr} \left( (H^\top H + \sqrt{2} H^\top \bar{Z}^0)^2 + (4 - 2\sqrt{2})(H^\top H)(H^\top \bar{Z}^0) + 2(H^\top H)(\bar{Z}^{0\top} \bar{Z}^0) \right) \\
&\geq \text{tr} \left( (4 - 2\sqrt{2})(H^\top H)(H^\top \bar{Z}^0) + 2(H^\top H)(\bar{Z}^\top \bar{Z}) \right) \\
&= \text{tr} \left( (4 - 2\sqrt{2})(H^\top H)(Z^{0\top} \bar{Z}^0) \right) + \text{tr} \left( (2\sqrt{2} - 2)(H^\top H)(\bar{Z}^\top \bar{Z}) \right),
\end{aligned}$$

where in the fourth line we used the property that the trace is invariant under cyclic permutations and  $H^\top \bar{Z}^0 = \bar{Z}^{0\top} H$ .

Since  $Z^{0\top} \bar{Z}^0$  is positive semidefinite,  $\text{tr}((H^\top H)(Z^{0\top} \bar{Z}^0))$  is nonnegative. Hence,

$$\begin{aligned}
\|Z^0 Z^{0\top} - Z^* Z^{*\top}\|_F^2 &\geq (2\sqrt{2} - 2) \text{tr}((H^\top H)(\bar{Z}^\top \bar{Z})) \\
&= (2\sqrt{2} - 2) \|H \bar{Z}^\top\|_F^2 \\
&\geq (2\sqrt{2} - 2) \|H\|_F^2 \sigma_r \\
&= (2\sqrt{2} - 2) \sigma_r d(Z^0, Z^*)^2.
\end{aligned}$$

If  $\delta \leq \frac{\sigma_r}{4\sqrt{r}}$ , then

$$d(Z^0, Z^*)^2 \leq \frac{\|Z^0 Z^0 - Z^* Z^{*\top}\|_F^2}{(2\sqrt{2} - 2)\sigma_r} \leq \frac{2r\delta^2}{(2\sqrt{2} - 2)\sigma_r} \leq \frac{3}{16} \sigma_r.$$

## F Sample Complexity

In this section, we verify that our assumptions hold with high probability if  $m \geq cn \log n$ , where  $c$  is a constant that depends on  $\delta$ ,  $r$ , and  $\kappa$ . Our proof relies on the following concentration inequality.

**Theorem 8.** (Matrix Bernstein Inequality [20]) Let  $S_1, \dots, S_m$  be independent random matrices with dimension  $n \times n$ . Assume that  $\mathbb{E}(S_i) = 0$  and  $\|S_i\| \leq L$ , for all  $i \in [m]$ . Let  $\nu^2 = \max \left\{ \left\| \sum_{i=1}^m \mathbb{E}(S_i S_i^\top) \right\|, \left\| \sum_{i=1}^m \mathbb{E}(S_i^\top S_i) \right\| \right\}$ . Then for all  $\delta \geq 0$ ,

$$\mathbb{P} \left( \left\| \frac{1}{m} \sum_{i=1}^m S_i \right\| \geq \delta \right) \leq 2n \exp \left( \frac{-m^2 \delta^2}{\nu^2 + Lm\delta/3} \right).$$

We first give a technical lemma that we will use later.

**Lemma 8.** Let  $A = (a_{ij})$  be a random matrix drawn from GOE. Let  $S = a_{11}A - 2e_1 e_1^\top$ . There exist absolute constants  $C, \rho$  such that with probability at least  $1 - Ce^{-\rho n}$ , we have

$$\|S\| \leq 18n.$$

*Proof.* Let  $\tilde{A} = A - a_{11}e_1e_1^\top$ .  $S = a_{11}\tilde{A} + (a_{11}^2 - 2)e_1e_1^\top$ . Note that  $a_{11}$  and  $\tilde{A}$  are independent, hence  $\|S\| \leq |a_{11}|\|\tilde{A}\| + |a_{11}^2 - 2|$ . Besides, since  $a_{11} \sim \mathcal{N}(0, 2)$ , we can see that  $a_{11}^2/2$  is  $\chi^2$  distributed.

First we bound the operator norm of  $\tilde{A}$ . We rewrite  $\|\tilde{A}\|$  as

$$\|\tilde{A}\| = \max_{\|u\|=1} |u^\top \tilde{A} u| = \max_{\|u\|=1} |u^\top D u - d u_1^2| \leq \|D\| + |d|,$$

where  $D = \tilde{A} + d e_1 e_1^\top$ ,  $d \sim \mathcal{N}(0, 2)$ . As  $D$  is GOE distributed, by Lemma 4,

$$\mathbb{P}(\|D\| > 3\sqrt{n}) \leq C' e^{-\rho' n}, \quad (14)$$

where  $C'$  and  $\rho'$  are absolute constants.

Using the Gaussian tail inequality, we have

$$\mathbb{P}(|d| > 2\sqrt{n}) \leq 2e^{-n}. \quad (15)$$

Combining inequalities (14) and (15), we have

$$\mathbb{P}(\|\tilde{A}\| > 5\sqrt{n}) \leq \mathbb{P}(\|D\| > 3\sqrt{n} \vee |d| > 2\sqrt{n}) \leq C' e^{-\rho' n} + 2e^{-n}, \quad (16)$$

where the last inequality follows from the union bound.

Next we bound the deviation of the  $\chi^2$  term. By the corollary of Lemma 1 in Laurent and Massart [13], we have

$$\mathbb{P}(|a_{11}^2 - 2| > 4(\sqrt{n} + n)) \leq 2e^{-n}. \quad (17)$$

Since  $a_{11}$  is identically distributed as  $d$ , inequality (15) holds for  $a_{11}$  as well. Namely,  $\mathbb{P}(|a_{11}| > 2\sqrt{n}) \leq 2e^{-n}$ . Combining this with inequalities (17), (16), we have

$$\mathbb{P}(\|S\| \leq 14n + 4\sqrt{n}) \geq 1 - 6e^{-n} - C' e^{-\rho' n}.$$

Finally, the statement is obtained by choosing proper  $C$ ,  $\rho$ , and using  $\sqrt{n} \leq n$ .  $\square$

## F.1 Proof of Theorem 6

*Proof.* It is equivalent to show that for any unit vector  $u$ , with high probability,

$$\left\| \frac{1}{m} \sum_{i=1}^m (u^\top A_i u) A_i - 2uu^\top \right\| \leq \frac{\delta}{r\sigma_1}.$$

If  $P$  is an orthonormal matrix, then

$$\begin{aligned} \left\| \frac{1}{m} \sum_{i=1}^m ((Pu)^\top A_i (Pu)) A_i - 2(Pu)(Pu)^\top \right\| &= \left\| \frac{1}{m} \sum_{i=1}^m (u^\top (P^\top A_i P) u) A_i - 2Pu u^\top P^\top \right\| \\ &= \left\| \frac{1}{m} \sum_{i=1}^m u^\top (P^\top A_i P) u P^\top A_i P - 2uu^\top \right\| \\ &= \left\| \frac{1}{m} \sum_{i=1}^m u^\top \tilde{A}_i u \tilde{A}_i - 2uu^\top \right\|, \end{aligned}$$

where in the second line we use unitary invariance of the operator norm, and in the last line we denote  $P^\top A_i P$  by  $\tilde{A}_i$ . Since the GOE is invariant under orthogonal conjugation,  $\tilde{A}_i$  and  $A_i$  are identically distributed. Hence, it suffices to prove the claim when  $u = e_1$ , i.e.

$$\left\| \frac{1}{m} \sum_{i=1}^m a_{11}^{(i)} A_i - 2e_1 e_1^\top \right\| \leq \delta_0,$$

where  $a_{11}^{(i)}$  is the  $(1, 1)$  entry of  $A_i$  and  $\delta_0 = \frac{\delta}{r\sigma_1}$ .

To show this, we apply Theorem 8, where  $S_i = a_{11}^{(i)} A_i - 2e_1 e_1^\top$ . This requires that the operator norm of  $S_i$  is bounded, for each  $i$ . We address this by noticing that with high probability  $\|S_i\| \leq 18n, \forall i$ . To be precise, by Lemma 8 there exist constants  $C, \rho$ , such that

$$\mathbb{P}(\|S_i\| > 18n) \leq C e^{-\rho n}, \quad i = 1, \dots, m.$$

Taking the union bound over all the  $S_i$ s leads to

$$\mathbb{P}\left(\max_i \|S_i\| > 18n\right) \leq m C e^{-\rho n}. \quad (18)$$

Next, we calculate  $\nu^2 = \|\sum_{i=1}^m \mathbb{E}(S_i^2)\| = m \|\mathbb{E}(S_1^2)\|$ . Let  $A = (a_{ij})$  denote  $A_1$ ,  $S$  denote  $S_1$ . We have  $\mathbb{E}(S^2) = \mathbb{E}(a_{11}^2 A^2) - 4e_1 e_1^\top$ , and

$$\begin{aligned} (a_{11}^2 A^2)_{11} &= a_{11}^4 + \sum_{k=2}^n a_{11}^2 a_{1k}^2, \\ (a_{11}^2 A^2)_{ii} &= a_{11}^2 \left( a_{ii}^2 + \sum_{k \neq i}^n a_{ik}^2 \right), \quad \forall i \neq 1, \\ (a_{11}^2 A^2)_{ij} &= a_{11}^2 \sum_{k=1}^n a_{ik} a_{jk}, \quad \forall i \neq j. \end{aligned}$$

It is easy to see that  $\mathbb{E}(a_{11}^2 A^2) = \text{diag}(2n+10, 2n+2, \dots, 2n+2)$ . Consequently,  $\nu^2 = (2n+6)m$ .

By Theorem 8, if  $m \geq \frac{42}{\min(\delta_0^2, \delta_0)} \cdot n \log n$ , then

$$\begin{aligned} \mathbb{P}\left(\left\|\frac{1}{m} \sum_{i=1}^m S_i\right\| \geq \delta_0\right) &\leq 2n \exp\left(\frac{-m\delta_0^2}{2n(1+3\delta_0)+6}\right) \\ &\leq 2n \exp\left(\frac{-m\delta_0^2}{2n(4+3\delta_0)}\right) \\ &\leq 2n \exp\left(\frac{-m\delta_0^2}{14n \cdot \max(1, \delta_0)}\right) \\ &\leq \frac{2}{n^2}. \end{aligned} \quad (19)$$

Combining inequalities (18) and (19), we conclude that

$$\mathbb{P}\left(\left\|\frac{1}{m} \sum_{i=1}^m a_{11}^{(i)} A_i - 2e_1 e_1^\top\right\| \leq \delta_0\right) \geq 1 - m C e^{-\rho n} - \frac{2}{n^2}.$$

□

## F.2 Proof of Theorem 7

The formulation of the second order partial derivatives and their expectations is given in Appendix B.

It is easy to see that for any  $\bar{Z} \in \mathcal{S}$ ,  $\max_{s \in [r]} \|\bar{z}_s\| \leq \sqrt{\sigma_1}$ . Thus it is sufficient to prove that for any two unitary vector  $u$  and  $y$  with high probability it holds that

$$\left\|\frac{1}{m} \sum_{i=1}^m 2A_i u y^\top A_i - 2u^\top y I - 2y u^\top\right\| \leq \frac{\delta}{r\sigma_1}.$$

We can decompose  $y$  as  $y = \beta u + \beta_\perp u_\perp$  for a certain unit vector  $u_\perp$  that is orthogonal to  $u$ , where  $\beta^2 + \beta_\perp^2 = 1$ . Let  $\delta_0 = \frac{\delta}{2r\sigma_1}$ . It suffices to prove the following two claims.

(i) For any unitary vector  $u$ , with high probability

$$\left\| \frac{1}{m} \sum_{i=1}^m 2A_i u u^\top A_i - 2I - 2u u^\top \right\| \leq \delta_0.$$

(ii) For any two orthogonal unit vectors  $u$  and  $u_\perp$ , with high probability

$$\left\| \frac{1}{m} \sum_{i=1}^m 2A_i u u_\perp^\top A_i - 2u_\perp u^\top \right\| \leq \delta_0.$$

### Proof of (i)

If  $P$  is an orthonormal matrix, then

$$\begin{aligned} \left\| \frac{1}{m} \sum_{i=1}^m 2A_i P u u^\top P A_i - 2I - 2P u u^\top P^\top \right\| &= \left\| \frac{1}{m} \sum_{i=1}^m 2P^\top A_i P u u^\top P^\top A_i P - 2I - 2u u^\top \right\| \\ &= \left\| \frac{1}{m} \sum_{i=1}^m 2\tilde{A}_i u u^\top \tilde{A}_i - 2I - 2u u^\top \right\|, \end{aligned}$$

where  $\tilde{A}_i$  and  $A_i$  have the same distribution. Hence we only need to prove the case where  $u = e_1$ :

$$\left\| \frac{1}{m} \sum_{i=1}^m 2v^{(i)} v^{(i)\top} - 2I - 2e_1 e_1^\top \right\| \leq \delta_0,$$

where  $v^{(i)} = A_i e_1$  is the first column of  $A_i$ .

Let  $S_i = 2(v^{(i)} v^{(i)\top} - I - e_1 e_1^\top)$ . To apply Theorem 8, we need to show that with high probability  $\|S_i\|$  is bounded for each  $i$  and calculate  $\nu^2 = \|\sum_{i=1}^n \mathbb{E}(S_i^2)\| = m \|\mathbb{E}(S_1^2)\|$ .

Let  $S, v, A$  denote  $S_1, v^{(1)}$ , and  $A^{(1)}$  respectively. It is easy to see that

$$\|S\| \leq 2\|v\|^2 + 4 = 2(w + a_{11}^2) + 4,$$

where  $w = \sum_{k=2}^n a_{1k}^2$ . As  $a_{11} \sim \mathcal{N}(0, 2)$ ,  $a_{1k} \sim \mathcal{N}(0, 1)$  for  $k \neq 1$ , we can see that  $a_{11}^2/2$  and  $w$  are  $\chi^2$  distributed with degrees of freedom 1 and  $n-1$ , respectively. Using the  $\chi^2$  tail bound, we have

$$\begin{aligned} \mathbb{P}(a_{11}^2/2 > 2(\sqrt{n} + n) + 1) &\leq e^{-n}, \\ \mathbb{P}(w > 5n - 1) &\leq e^{-n}, \quad k = 2, \dots, n. \end{aligned}$$

It follows from the union bound that

$$\mathbb{P}(\|S\| > 26n + 6) \leq 2e^{-n},$$

and consequently

$$\mathbb{P}\left(\max_i \|S_i\| > 26n + 6\right) \leq 2me^{-n}. \quad (20)$$

To calculate  $\nu^2$ , we expand  $\mathbb{E}(S^2)$  as

$$\begin{aligned} \mathbb{E}(S^2) &= 4\mathbb{E}((vv^\top)^2) - 4(I + e_1 e_1^\top)^2 \\ &= 4\mathbb{E}(\|v\|^2 vv^\top) - 4(I + 3e_1 e_1^\top). \end{aligned}$$

Some simple calculations show that

$$\begin{aligned} (\|v\|^2 vv^\top)_{11} &= v_1^4 + \sum_{k=2}^n v_k^2 v_1^2, \\ (\|v\|^2 vv^\top)_{jj} &= v_1^2 v_j^2 + v_j^4 + \sum_{k \neq 1, j} v_k^2 v_j^2, \quad j = 2, \dots, n, \\ (\|v\|^2 vv^\top)_{jl} &= \sum_{k=1}^n v_k^2 v_j v_l, \quad j < l. \end{aligned}$$

As  $v_1 \sim \mathcal{N}(0, 2)$ ,  $v_j \sim \mathcal{N}(0, 1)$  for  $j \neq 1$ ,

$$\begin{aligned}\mathbb{E} \left( \|v\|^2 v v^\top \right)_{11} &= 2n + 10, \\ \mathbb{E} \left( \|v\|^2 v v^\top \right)_{jj} &= n + 3, \quad j = 2, \dots, n, \\ \mathbb{E} \left( \|v\|^2 v v^\top \right)_{jl} &= 0, \quad j < l.\end{aligned}$$

Hence,  $\mathbb{E}(S^2) = \text{diag}(8n + 24, 4n + 8, \dots, 4n + 8)$  and thus  $\nu^2 = m(8n + 24)$ .

If  $m \geq (128/\min(\delta_0^2, \delta_0))n \log n$ , then by applying Theorem 8 we can see

$$\begin{aligned}\mathbb{P} \left( \left\| \frac{1}{m} \sum_{i=1}^m 2v^{(i)} v^{(i)\top} - 2I - 2e_1 e_1^\top \right\| > \delta_0 \right) &\leq 2n \exp \left( \frac{-m\delta_0^2}{8n + 24 + (\frac{26}{3}n + 2)\delta_0} \right) \\ &\leq 2n \exp \left( \frac{-m\delta_0^2}{(128/3)n \max(1, \delta_0)} \right) \\ &\leq \frac{2}{n^2}.\end{aligned}\tag{21}$$

Combining inequalities (21) and (20) leads to

$$\mathbb{P} \left( \left\| \frac{1}{m} \sum_{i=1}^m 2v^{(i)} v^{(i)\top} - 2I - 2e_1 e_1^\top \right\| \leq \delta_0 \right) \geq 1 - 2me^{-n} - \frac{2}{n^2}.$$

#### Proof of (ii)

We only need to prove the case where  $u = e_1$  and  $u_\perp = e_2$  due to the same reason above. That is,

$$\left\| \frac{1}{m} \sum_{i=1}^m 2v^{(i)} q^{(i)\top} - 2e_2 e_1^\top \right\| \leq \delta_0,$$

where  $v^{(i)}$  and  $q^{(i)}$  are the first and second columns of  $A_i$ .

As before, let  $S_i = 2(v^{(i)} q^{(i)\top} - e_2 e_1^\top)$  and let  $S, v, q, A$  denote  $S_1, v^{(1)}, q^{(1)}$  and  $A^{(1)}$  respectively. From the proof of (i), we can see that with probability at least  $1 - 4e^{-n}$  both  $\|v\|$  and  $\|q\|$  are no larger than  $\sqrt{13n + 1}$ . Since  $\|S\| \leq 2\|v\| \|q\| + 2$ , we have

$$\mathbb{P} \left( \max_i \|S_i\| \geq 26n + 4 \right) \leq 4me^{-n}.$$

Next, we calculate  $\nu^2 = m \max \{ \|\mathbb{E}(SS^\top)\|, \|\mathbb{E}(S^\top S)\| \}$ .

$$\mathbb{E}(SS^\top) = 4\mathbb{E}(\|q\|^2) \mathbb{E}(vv^\top) + 4e_2 e_2^\top.$$

$$\mathbb{E}(S^\top S) = 4\mathbb{E}(\|v\|^2) \mathbb{E}(qq^\top) + 4e_1 e_1^\top.$$

Some simple calculation shows that  $\mathbb{E}(\|v\|^2) = \mathbb{E}(\|q\|^2) = n + 1$ ,  $\mathbb{E}(vv^\top) = I + e_1 e_1^\top$  and  $\mathbb{E}(qq^\top) = I + e_2 e_2^\top$ . Hence,

$$\mathbb{E}(SS^\top) = 4(n + 1)I + 4(n + 1)e_1 e_1^\top + 4e_2 e_2^\top,$$

$$\mathbb{E}(S^\top S) = 4(n + 1)I + 4(n + 1)e_2 e_2^\top + 4e_1 e_1^\top,$$

and  $\nu^2 = 8(n + 1)m$ . If  $m \geq \frac{78}{\min(\delta_0^2, \delta_0)}n \log n$ , then by applying Theorem 8 we have

$$\begin{aligned}\mathbb{P} \left( \left\| \frac{1}{m} \sum_{i=1}^m 2v^{(i)} q^{(i)\top} - 2e_1 e_2^\top \right\| > \delta_0 \right) &\leq 2n \exp \left( \frac{-m\delta_0^2}{8n + 8 + (\frac{26n+4}{3})\delta_0} \right) \\ &\leq 2n \exp \left( \frac{-m\delta_0^2}{26n \max(1, \delta_0)} \right) \\ &\leq \frac{2}{n^2}.\end{aligned}\tag{22}$$

This means,

$$\mathbb{P} \left( \left\| \frac{1}{m} \sum_{i=1}^m 2v^{(i)} q^{(i)\top} - 2e_1 e_2^\top \right\| \leq \delta_0 \right) \geq 1 - 4me^{-n} - \frac{2}{n^2}.$$

## G ADMM for Nuclear Norm Minimization

We reformulate the nuclear norm minimizing problem as

$$\min_{X \in \mathbb{R}^{n \times n}} \frac{1}{2\lambda} \|\mathcal{A}(X) - b\|^2 + \|X\|_*, \quad (23)$$

where  $\lambda > 0$  is the regularization parameter.  $\lambda \rightarrow 0$  will enforce the minimizer  $X_{\text{nuc}}^*$  satisfying the affine constraint  $\mathcal{A}(X_{\text{nuc}}^*) = b$ .

We apply ADMM to the dual problem of (23):

$$\begin{aligned} \min_{\alpha \in \mathbb{R}^m, V \in \mathbb{R}^{n \times n}} \quad & \frac{\lambda}{2} \|\alpha\|^2 - \alpha^\top b \\ \text{subject to} \quad & \|V\| \leq 1 \\ & \mathcal{A}^\top(\alpha) = V, \end{aligned} \quad (24)$$

where we introduce an auxiliary variable  $V$  to make this problem equality constrained.

The augmented Lagrangian of problem (24) can be written as

$$L_\eta(\alpha, X) = \frac{\lambda}{2} \|\alpha\|^2 - \alpha^\top b + \mathbf{1}_{\|\cdot\| \leq 1}(V) + \langle X, \mathcal{A}^\top(\alpha) - V \rangle + \frac{\eta}{2} \|\mathcal{A}^\top(\alpha) - V\|_F^2,$$

where  $X$  is the multiplier,  $\eta$  is the penalty parameter, and  $\mathbf{1}_{\|\cdot\| \leq 1}$  is the indicator function of the unit spectral norm ball i.e.  $\mathbf{1}_{\|\cdot\| \leq 1}(V)$  equals 0 if  $\|V\| \leq 1$  and  $+\infty$  otherwise.

Let  $\text{vec}(\cdot)$  denote the vectorization of a matrix, whose inverse mapping is denoted by  $\text{mat}(\cdot)$ . We can rewrite the transformations as  $\mathcal{A}(X) = \mathbf{A} \text{vec}(X)$  and  $\mathcal{A}^\top(\alpha) = \text{mat}(\mathbf{A}^\top \alpha) = \sum_{i=1}^m \alpha_i A_i$ , where  $\mathbf{A}$  is a  $m \times n^2$  matrix whose  $i$ th row is  $\text{vec}(A_i)^\top$ .

The ADMM starts from initialization  $(\alpha^0, V^0, X^0)$  and updates the three variables alternately. The updates can be computed in close forms:

$$\begin{aligned} \alpha^{k+1} &= (\lambda I + \eta \mathbf{A} \mathbf{A}^\top)^{-1} \left( b + \mathbf{A} \text{vec}(\eta V^k - X^k) \right), \\ V^{k+1} &= \text{proj} \left( \sum_{i=1}^m \alpha_i^{k+1} A_i + X^k / \eta \right), \\ X^{k+1} &= X^k + \eta \left( \sum_{i=1}^m \alpha_i^{k+1} A_i - V^{k+1} \right), \end{aligned}$$

where  $\text{proj}(\cdot)$  is the projection onto the unit spectral norm ball. Let  $X = U \Sigma V^\top$  be the singular value decomposition of  $X$ ,

$$\text{proj}(X) = U \min(\Sigma, 1) V^\top.$$

In fact, the update of  $V$  can be combined with other steps without being computed explicitly. One only has to iterate the following two steps:

$$\begin{aligned} \alpha^{k+1} &= (\lambda I + \eta \mathbf{A} \mathbf{A}^\top)^{-1} \left( b + \mathbf{A} \text{vec} \left( \eta \sum_{i=1}^m \alpha_i^k A_i + X^{k-1} - 2X^k \right) \right), \\ X^{k+1} &= \text{prox}_\eta \left( \eta \sum_{i=1}^m \alpha_i^{k+1} A_i + X^k \right), \end{aligned}$$

where  $\text{prox}_\eta(\cdot)$  is the singular value soft-thresholding operator defined as

$$\text{prox}_\eta(X) = U \max(\Sigma - \eta, 0) V^\top.$$

The sequence of multipliers  $\{X^k\}$  converges to the primal solution of (23). To speed up the update of  $\alpha$ , the Cholesky decomposition of  $\lambda I + \eta \mathbf{A} \mathbf{A}^\top$  is precomputed in our implementation.
